# Supplementary material
Source: bioRxiv or medRxiv preprint supplement (https://www.biorxiv.org/content/biorxiv/early/2019/01/11/518365/DC1/embed/media-1.pdf)
Supplement: Supplementary file [file media-1.pdf]

A.

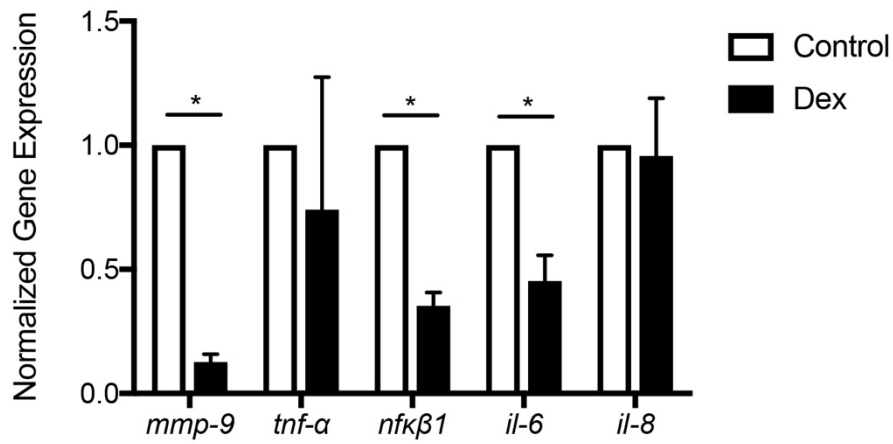

**Supplemental Fig 1. Dexamethasone treatment suppresses the expression of inflammatory genes following photoreceptor injury.**

(A) qRT-PCR for the inflammatory genes *mmp-9*, *tnf-a*, *nfkb1*, *il-8*, and *il-6* from control and Dex-treated retinas at 72 hpl. \*p≤0.05.

A.

Wild-Type: FULL Mmp9 protein

5' Frame 1  
Met RLGVL LELVLGTCSLRAWCLPLKSVFVTFPGDVIKN Met TNTQLADEYLKRYGYVDVLRSGLQAVISNAKALKKLRQLG  
LEETGLL OPTVDA Met Met KQPRCGVPDIRNYKTFDGDLDKWDHTDVTYRILNYSPD Met EASLIDDAFARAFKVVSDVPTLTFTRL  
FDGIADIMet SFGKLDHGDYPPFDGKDGLLAHAYPPGEGTQGDHAFDDDEYWTLSGPAIQTRYGNAEGA Met CHFPFLFEG  
TSYSTCTTEGRTDGLPWCSTTADYDKDKKFGFCPELLFTFDGNSNEAPCVFPFVFDGKKYDSCCTTEGRNDGYRWCSTTAN  
FDTDKKYGFCPNRDTAVIGGNSEGEPCHPFPTFLGNTYSSCTSEGRNDGKLWCGTTSNYDTDKKWGFPCDRGYSFLVAAH  
EFGHALGLDHSNIKDAL Met YP Met YKYVEGFPLHRDDIDGIQYLYGPRTGPEPTAPQPRTTTTSSPVVPTKPSPSDKTTTASTTT  
QVVPSSDDACQIKEFDAITEIQKELHFFKDGRYWKISGNGERKGGPF Met ISAKWPALPAVINSAFEDHLLTKKIYFFSERQFVWYS  
GNDVLPKRKIEKLGPSDLDKVEGS Met QQRGKGVLLFNGENFWRLDVKAQLIDRGYPRFTDAAFGGVPIDSHDVFLYKGGFFY  
FCRESFYWR Met NAKRQVDRVGYYKDLLKCSDIHSL Stop

8 bp Insertion

5' Frame 1  
Met RLGVL LELVLGTCSLRAWCLPLKSVFVTFPGDVIKN Met TNTQLADEYLKRYGYVDVLRSGLQAVISNAKALKKLRQLG  
LEETGLL OPTVDA Met Met Stop SSPAVACRTSATTRHSTET Stop SGITQ Met SHTGF Stop TIRQTKWPL Stop S Met Met LPELLKF  
GVTSPL Stop RSHASLTALLS Stop SLSGN Stop ITVIPTL Met EK Met GCWLTLLQVKAHRETLIL Met T Met NTGPLALDQPFKPA  
V Met LRVCVTPSPSCLREHPTPPAPLRAAQ Met VFPGAOPPQT Met TRTRSLASVPSFSSHLTGTA Met KHHVFSPLFL Met GRN  
Met IHALQKDE Met TDIAGAPLQLTLIRSR Met DSALTEIRL Stop LVETQKESHAIFHSPSWETHTHPAPVRAA Met Met ENSGV  
ELP AT Met ILIKNGDFALIVDTVCFWLL Met SLD Met LLVWITPTLK Met P Stop CIPCTNTWRVSPCIV Met IL Met AFSIS Met DLELALN  
LLNHGPPPLPQLCRRNLLQVTKQLPPLPQLRWSLQT Met PAKSRSLTPSLKSRSSFTSSRTGATGRSQAMet VNAKVLV Stop SL  
RSGLLSLSSTLPLRTTSPKRSTSSQRDSSGFTVE Met Met CLDHVKSRSAYQATWTKWKDLCREEKARCSCL Met EKTSGDL  
Met Stop RLS Stop LTEDTLDL Met QLSVECLIH Met Met YSSTRSSSTSAGRSTGE Stop Met PNGRLTESV Met Stop STTS Stop NAVT  
FILY

23 bp Deletion

5' Frame 1  
Met RLGVL AFLVLTCSLRAWCLPLKSVFVTFPGDVIKN Met TNTQLADEYLKRYGYVDVLRSGLQAVISNAKALKK  
QRQLGLEETGLLD OPTLWRAGHPQLQDIRRRPEVGSRRCHIQDFELFARHGSLFDR Stop CFCQSF Stop SLE Stop RHP  
SDVHTPL Stop RHC Stop HHDLFRETRSR Stop SLPL Stop WKRWAAGSRLSSR Stop RHTGRRSF Stop Stop R Stop ILDPWLW  
TSHSNPLR Stop C Stop GCNVSLLPLV Stop GNILLHLHH Stop GPHRWSSLLVNHRRLL Stop QGQEVWLLSQ Stop ASLHI Stop  
REQQ Stop ST Met CFPLCF Stop WEEI Stop F Met HYRRTK Stop RISLVLHYS Stop L Stop H Stop Stop EVWILP Stop QRYGCDWW  
KLRRRA Met PFSIHLPGKHILILHQ Stop GPQ Stop WKTWVWNYQQL Stop Y Stop Stop K Met GILP Stop SWIQSVSGGCS Stop V  
WTCWFGSLQH Stop RCPDVSHVQIRGGFPLAS Stop Stop Y Stop WSHVSLWT Stop NWP Stop THCSSTDDHHFLSSCANE  
TFSK Stop QNNHCFHHNSGGPFRRCPLPNQGV Stop RHH Stop NPEGASLLQGRALLEDLRQW Stop TQRFSFDLCEVACS  
PSCHQLCL Stop GPPHQKDLLLRETVLGLQWK Stop CAWTT Stop NREARPTKRLGQSGRIYAERKRQGAPV Stop WRKL  
LET Stop CKGSAD Stop QRIPSIH Stop CSFRWSAH Stop FT Stop CIPLQIGILLLLPGELLENECQTAG Stop PSRLCEVRPPE  
Met Q Stop HSFSI

**Supplemental Fig 2. *mmp-9* INDELS result in predicted premature stop codons. (A)** The predicted amino acid sequence for wild-type and the 8bp insertion and 23bp deletion mutants. The black box denotes the gRNA target.

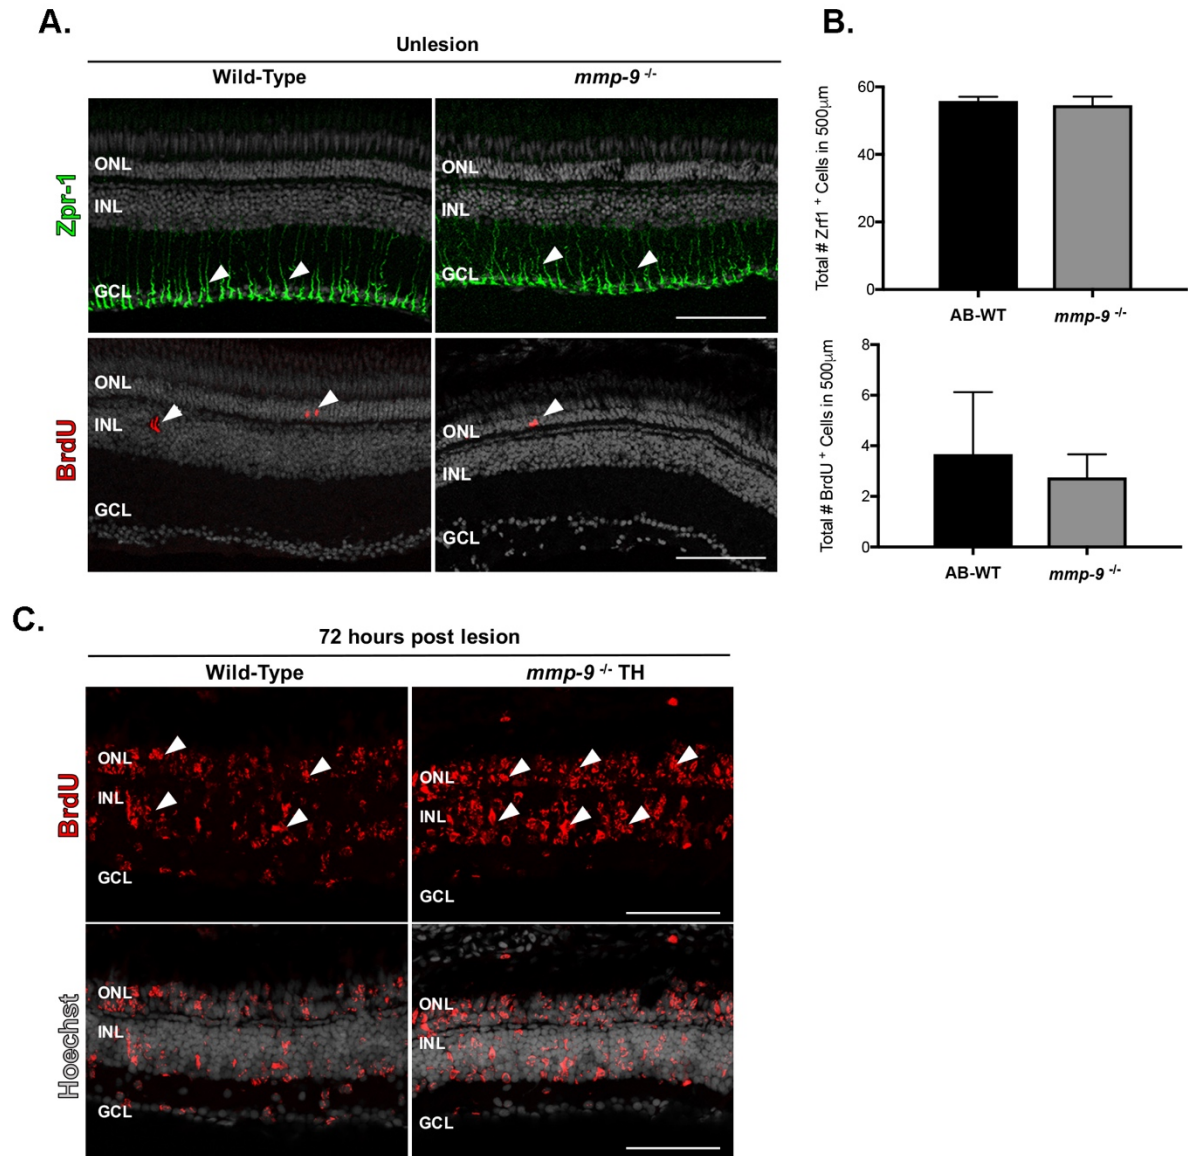

**Supplemental Fig 3. The number of Müller glia and dividing cells in unlesioned retinas is not altered between wild-type and mutants; photoreceptor death in transheterozygotes results in hyperproliferation.**

**(A)** Processes of Müller glia (green) stained with the zrf-1 antibody (top). BrdU-labeled cells (arrowheads) in wild-type and mutant retinas. **(B)** Number of Müller glia (top) and dividing cells (bottom) in wild-type and mutant retinas. **(C)** BrdU-labeled cells (red) in wild-type (left) and transheterozygote retinas (right), illustrating the replication of the overproduction of injury-induced progenitors in transheterozygotes. Scale bars equal 25µm.
